# Supplementary material for: A fully automated assay to detect the expression of pan-cytokeratins and of EML4-ALK fusion protein in circulating tumour cells (CTCs) predicts outcome of non-small cell lung cancer (NSCLC) patients
Source: PubMed Central journal article supplement — Transl Lung Cancer Res. 2021 Jan;10(1):80–92. doi: 10.21037/tlcr-20-855 (PMC7867748; doi:10.21037/tlcr-20-855), 2021-01
Supplement: tlcr-10-01-80-dss.pdf [file tlcr-10-01-80-dss.pdf]

## Data Sharing Statement

|                     |                                                                                                                                                     |                                                                                                                                                          |
|---------------------|-----------------------------------------------------------------------------------------------------------------------------------------------------|----------------------------------------------------------------------------------------------------------------------------------------------------------|
| <b>Article Info</b> | <a href="http://dx.doi.org/10.21037/tlcr-20-855">http://dx.doi.org/10.21037/tlcr-20-855</a>                                                         |                                                                                                                                                          |
| <b>Item</b>         | <b>Question</b>                                                                                                                                     | <b>Authors' Response<br/>(place - if not applicable)</b>                                                                                                 |
| 1                   | Would you like to share data collected for your study to others?                                                                                    | The datasets generated during and/or analysed during the current study are available from the corresponding authors (ER and RZ) upon reasonable request. |
| 2                   | If not, would you like to share the reason for your decision?                                                                                       | -                                                                                                                                                        |
| 3                   | What data in particular will be shared?                                                                                                             | Datasets of CTC enumeration                                                                                                                              |
| 4                   | Any other documents will be shared? Such as study protocol, statistical analysis plan, informed consent form, clinical study report, analytic code. | None other data will be shared                                                                                                                           |
| 5                   | When will data availability begin?                                                                                                                  | Data will be available after study publication                                                                                                           |
| 6                   | When will data availability end?                                                                                                                    | Data availability will end at December 2022                                                                                                              |
| 7                   | To whom will you share the data?                                                                                                                    | Data will be shared to academic researchers involved in liquid biopsy studies                                                                            |
| 8                   | For what type of analysis or purpose?                                                                                                               | Meta-analysis or pooled-analysis of individual data                                                                                                      |
| 9                   | How or where can the data/documents be obtained?                                                                                                    | Datasets can be obtained upon written request to the corresponding authors (ER and RZ)                                                                   |
| 10                  | Any other restrictions?                                                                                                                             | Commercial exploitation of datasets is excluded                                                                                                          |
